# Supplementary material for: Accelerating electrochemically catalyzed nitrogen reductions using metalloporphyrin-mediated metal–nitrogen-doped carbon (M–N–C) catalysts
Source: Royal Society of Chemistry journal article supplement (doi:10.1039/d2dt01258h), 2022-01-01
Supplement: d2dt01258h1.pdf [file d2dt01258h1.pdf]

## Supporting Information

### Accelerating Electrochemically Catalyzed Nitrogen Reductions on Metalloporphyrin-Mediated Metal-Nitrogen-Doped Carbon (M-N-C) Catalysts

Xinyi Dong, Weihua Zhu\*, Xu Liang\*

School of Chemistry and Chemical Engineering, Jiangsu University, Zhenjiang 212013, P. R. China

Corresponding to: E-mail: [liangxu@ujs.edu.cn](mailto:liangxu@ujs.edu.cn) (to X. Liang); E-mail: [sayman@ujs.edu.cn](mailto:sayman@ujs.edu.cn) (to W. Zhu)

#### 1.1 Chemicals and materials

Analytical grade pure reagents anhydrous sodium sulfate, ammonium chloride, sodium salicylate, trisodium citrate, isopropanol, acetone, anhydrous ethanol, *p*-dimethylaminobenzaldehyde, sodium hydroxide, Nafion solution and reduced graphene oxide were purchased from Shanghai Aladdin Biochemical Technology Co., Ltd. Hydrochloric acid and sulfuric acid were obtained from Sinopharm Chemical Reagent Co. Ltd. Sodium nitroprusside dihydrate was purchased from Shanghai D&B Biological Science and Technology Co. Ltd. Tetraphenyl iron porphyrin was purchased from Alfa Aesar (China) Chemical Co., Ltd. Nickel-, manganese-, zinc-, cobalt- and copper-porphyrins were synthesized by experiments. All commercial chemicals used in this experiment were not further purified. Deionized water was used in all experiments.

#### 1.2 Preparation of Catalysts

##### 1.2.1 Preparation of MTPP@rGO-t (M=Fe, Ni)

First, 30 mg of MTPP (M=Fe, Ni) were dissolved in 15mL dichloromethane solution via sonicating for 15 min to form a clear solution. 20 mg of rGO was then added and sonicated together for 30 min to obtain a suspension. The mixture was stirred continuously at room temperature for 12 hours. After dried on a rotary evaporator, the obtained powder, which is denoted as MTPP@rGO (M = Fe, Ni), was placed in a porcelain boat and annealed in the tube furnace with pure Ar flow. Pyrolysis

temperature procedure was set as follows: firstly, raise the temperature to 500°C at the rate of 5 °C min<sup>-1</sup>; then continue to raise the temperature to t °C (t = 600/700/800/900) at the rate of 10°C min<sup>-1</sup>; afterwards, maintain the temperature for 2 hours, then lower the temperature to 500 °C at the rate of 10 °C min<sup>-1</sup>, continue to lower the temperature to 300 °C at the rate of 5 °C min<sup>-1</sup>, and then wait for it to cool naturally to room temperature. And finally, the pyrolysis products were stirred in 0.5 M H<sub>2</sub>SO<sub>4</sub> for 12h to remove the impurities, and then washed for several times with isopropanol to remove sulfuric acid, and dried on a rotary evaporator to eventually obtained MTPP@rGO-t (M = Fe, Ni; t=600/700/800/900).

### 1.2.2 Preparation of Fe<sub>0.95</sub>M<sub>0.05</sub>TPP@rGO-800 (M=Mn, Ni, Zn, Cu, Co)

Fe<sub>0.95</sub>M<sub>0.05</sub>TPP@rGO (M=Mn, Ni, Zn, Cu, Co) was prepared in parallel by the same method as that for MTPP@rGO (M = Fe, Ni), except for using 28.5 mg of FeTPP and 1.5 mg of MTPP (M = Mn, Ni, Zn, Cu, Co) to achieve the targeted dual-metal-atom catalysts. The obtained Fe<sub>0.95</sub>M<sub>0.05</sub>TPP@rGO (M = Mn, Ni, Zn, Cu, Co) was then annealed at 800 °C by the pyrolysis temperature procedure identical to that for MTPP@rGO-t, after which the pyrolysis products were treated with acid and isopropanol as that in 1.2.1 to eventually obtained Fe<sub>0.95</sub>M<sub>0.05</sub>TPP@rGO-800 (M = Mn, Ni, Zn, Cu, Co).

### 1.2.3 Preparation of Fe<sub>1-x</sub>Ni<sub>x</sub>TPP@rGO-800 (x = 1%, 3%, 5%, 7%)

Control the mass ratio of NiTPP to FeTPP at 1%, 3%, 5% and 7% to prepare Fe<sub>1-x</sub>Ni<sub>x</sub>TPP@rGO-800 (x=1%, 3%, 5%, 7%) according to the same method as that for FeTPP@rGO-800.

## 1.3 Characterization

Powder X-ray diffraction (XRD) analysis was performed by a Shimadzu 6100 X-ray diffractometer equipped with high intensity Cu-Kα radiation. Scanning electron microscope (SEM) was collected by a JSM-6010PLUS/LA thermal field emission scanning electron microscopy (JEOL, Japan). Fourier transform infrared (FT-IR) spectra were recorded by Nicolet Nexus 470 FT-IR instrument (KBr tableting). X-ray photoelectron spectroscopy (XPS) was carried out on a Thermo Escalab 250Xi XPS system with Al Kα radiation. Raman measurements were made on a Thermo Scientific DXR Smart Raman spectrometer using a 532 nm laser.

#### 1.4 Preparation of carbon paper electrode

The 0.5×0.5 cm<sup>2</sup> carbon paper was sonicated respectively in 10 mL of absolute ethanol, acetone and absolute ethanol again for 10 min, and dried at room temperature. 2 mg catalyst and 40 μL of Nafion solution were dispersed in 760 μL of isopropyl alcohol by sonicating for 30 min to form a homogeneous catalyst ink. Afterwards, 100 μL of the ink was pipetted on each side of the carbon paper respectively, and dried under room temperature. The carbon paper electrode with catalyst loading of 1.0 mg cm<sup>-2</sup> was obtained.

#### 1.5 Electrochemical measurements

The Nafion 117 membrane was immersed in 5 wt% H<sub>2</sub>O<sub>2</sub> and 5 wt% H<sub>2</sub>SO<sub>4</sub> solution at 80 °C for 1h respectively, and the treated Nafion 117 membrane was then used to separate the airtight H-cell connected to an electrochemical workstation (CHI 730D). The conventional three-electrode system was adopted for electrochemical measurement by using carbon paper with catalyst as a working electrode and graphite rod as a counter electrode, and saturated Ag/AgCl (saturated KCl) electrode as a reference electrode. 25 mL of 0.1M Na<sub>2</sub>SO<sub>4</sub> were added respectively to the cathodic and anodic cell. The electrolyte was purged with high-purity N<sub>2</sub> or Ar before each measurement. In order to eliminate possible NH<sub>3</sub> and NO<sub>x</sub> pollutants in the feeding gas, N<sub>2</sub> or Ar shall pass through the concentrated sulfuric acid gas washing device and alkali lime drying device before purged to the cathodic cell. NH<sub>3</sub> produced by the reaction mainly exists in the neutral electrolyte solution in the form of NH<sub>4</sub><sup>+</sup>. Potentials observed using Ag/AgCl were converted to reversible hydrogen electrode (RHE) using the Nernst equation  $E_{\text{RHE}} = E_{\text{Ag/AgCl}} + 0.059\text{pH} + E^0_{\text{Ag/AgCl}}$ , where  $E_{\text{Ag/AgCl}}$  is the experimentally determined potential using Ag/AgCl reference electrode;  $E^0_{\text{Ag/AgCl}}$  is 0.199V at 25 °C. All experiments were carried out at room temperature.

#### 1.6 Determination of NH<sub>3</sub>.

In this work, indophenol blue spectrophotometry method was used to detect and quantify NH<sub>3</sub> produced by electrochemical NRR. Prepare the following solutions: 1) Oxidizing solution: 0.05 M NaClO solution (6-14% available chlorine); 2) Coloring solution: 1 M NaOH solution containing 5 % sodium salicylate and 5 % trisodium citrate dehydrate; 3) Catalyst solution: 1.01 g

$\text{Na}_2[\text{Fe}(\text{CN})_5\text{NO}] \cdot 2\text{H}_2\text{O}$  diluted to 100 mL with deionized water; 4) Standard solution: ammonium chloride ( $\text{NH}_4\text{Cl}$ ) in a series of concentrations. In detail, 2 mL of oxidizing solution, 1 mL of coloring solution, and 0.2 mL of catalyst solution were added into the 2 mL electrolyte, which was taken from the cathodic cell after NRR. The obtained mixture solution was diluted to 10 mL using the deionized water. After standing in dark at room temperature for 2 h, the solution was measured on a UV-vis spectrophotometer. The maximum UV-vis absorption was measured at 689 nm. The concentration-absorbance curves were calibrated using standard  $\text{NH}_4\text{Cl}$  solution in a series of concentrations at maximum absorbance via the same procedure as mentioned above. The fitting curve (*Figure S1*, see ESI) is  $y = 0.08051x + 0.01435$ , which shows a good linear relation between absorbance with  $\text{NH}_3$  concentration ( $R^2 = 0.9999$ ) and can be used to detect the quantity of  $\text{NH}_3$  in subsequent tests.

### 1.7 Determination of hydrazine ( $\text{N}_2\text{H}_4$ )

Hydrazine is also a possible product in addition to  $\text{NH}_3$  in the process of electrochemical NRR, and it was detected by UV-vis spectroscopy using the method of Watt and Chrisp. The color reagent was prepared by a mixed solution of 4 g of *p*-dimethylaminobenzaldehyde, 20 mL of concentrated hydrochloric acid and 200 mL of absolute ethanol. Specifically, 5 mL of color reagent was added into 5 mL of electrolyte, which was taken from the cathodic cell after NRR. After standing in dark at room temperature for 20 min, the solution was measured on a UV-vis spectrophotometer. The maximum UV-vis absorption was measured at 460 nm. The concentration-absorbance curves were calibrated using standard  $\text{N}_2\text{H}_4 \cdot \text{H}_2\text{O}$  solution in a series of concentrations. As shown in *Figure S2*, the fitting curve shows a good linear relation between absorbance with  $\text{N}_2\text{H}_4$  concentration ( $R^2 = 0.9999$ ), which can be used to detect the quantity of  $\text{N}_2\text{H}_4$  in subsequent tests.

### 1.8 Computational formulas of $\text{NH}_3$ yield rate and Faradaic efficiency

$\text{NH}_3$  yield and Faradaic efficiency are important indicators to measure the performance of catalysts. The  $\text{NH}_3$  yield rate is calculated as follows:

$$\text{NH}_3 \text{ yield rate} = \frac{C_{\text{NH}_3} \times V}{t \times m}$$

Where  $C_{\text{NH}_3}$  ( $\mu\text{g/mL}$ ) is the concentration of the produced  $\text{NH}_3$ ,  $V(\text{mL})$  is the volume of

electrolyte,  $t$ (h) is the reduction reaction time,  $m$  (mg) is the mass of the catalyst. The Faradaic efficiency of NRR is defined as the percentage of the electric charge consumed by the synthesis for  $\text{NH}_3$  to the total electric charge in the electrolysis process. Assuming that three electrons are consumed to produce an  $\text{NH}_3$  molecule, the Faradaic efficiency can be calculated as follows:

$$FE = \frac{3 \times F \times C_{\text{NH}_3} \times V}{17 \times Q} \times 100\%$$

Where  $F$  is the Faradaic constant (96485 C/mol),  $Q$  (C) is the quantity of charge integrated by the chronoamperometry curve.

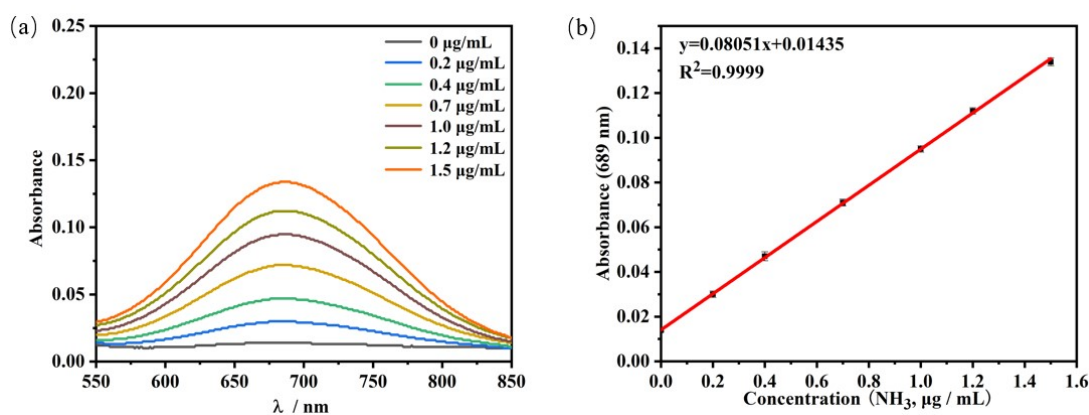

**Figure S1.** (a) UV-vis absorption spectra of the different concentrations of  $\text{NH}_4\text{Cl}$  solution stained with indophenol indicator after 2 h incubation. (b) Calibration curve of  $\text{NH}_3$  plotted by known  $\text{NH}_4^+$  concentration.

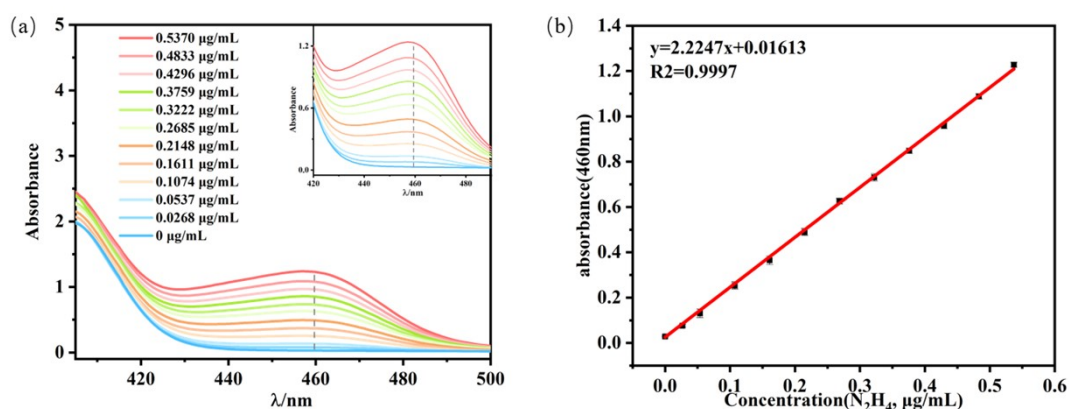

**Figure S2.** (a) UV-vis absorption spectra of different concentrations of  $\text{N}_2\text{H}_4$  solution stained with coloring reagent (p- $\text{C}_9\text{H}_{11}\text{NO}$ ,  $\text{HCl}$ , and  $\text{C}_2\text{H}_5\text{OH}$ ) after incubation for 20 min at room temperature. (b) Calibration curve for calculating the  $\text{N}_2\text{H}_4$  concentration.

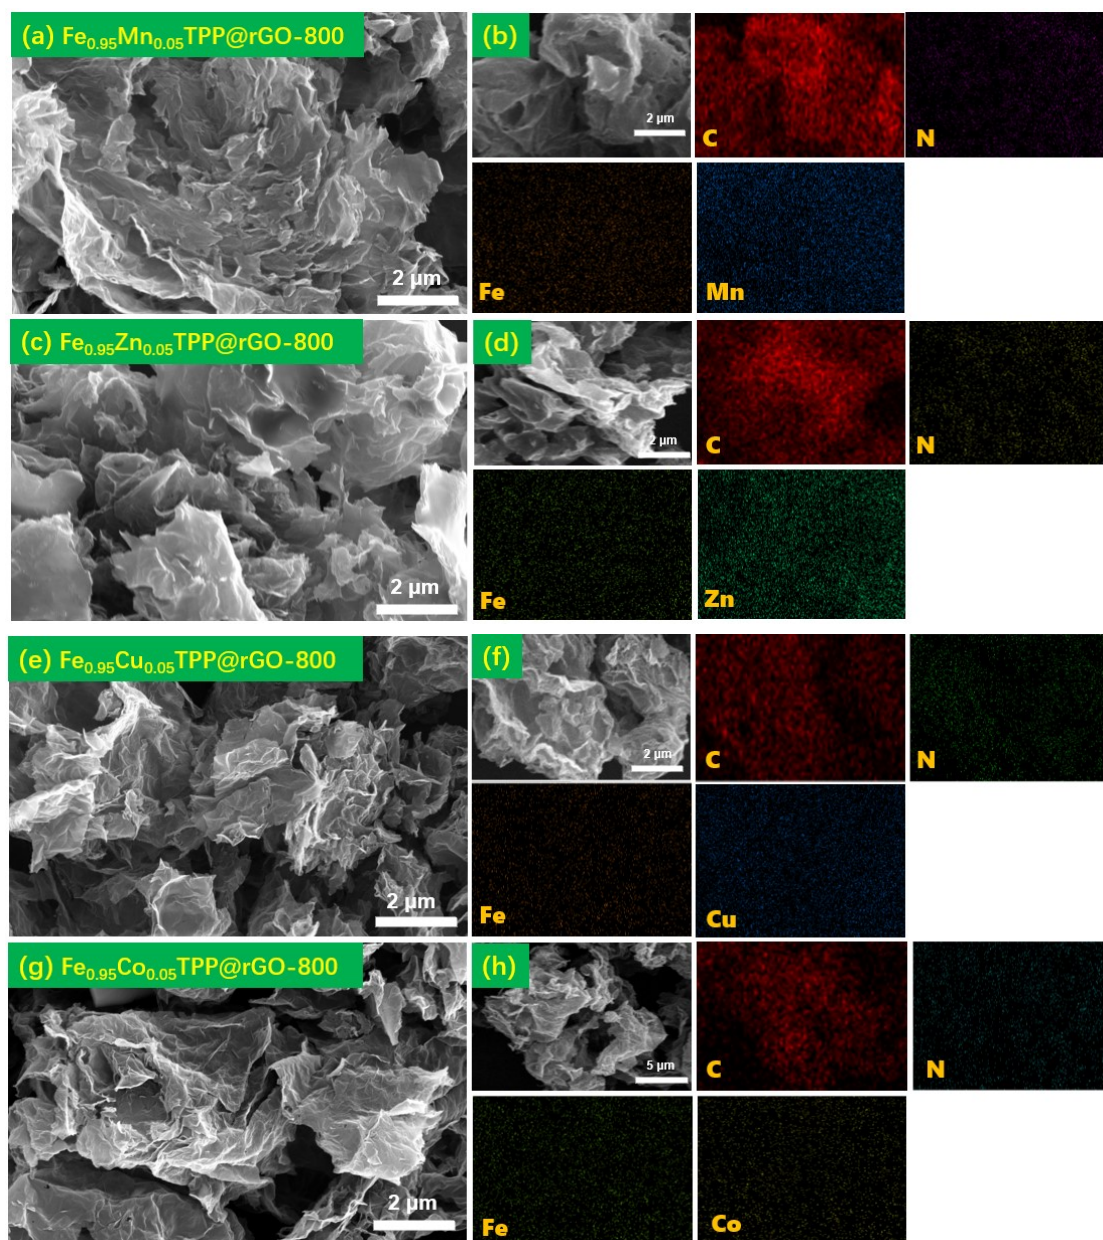

**Figure S3.** (a,c,e,g) SEM images of  $\text{Fe}_{0.95}\text{M}_{0.05}\text{TPP@rGO-800}$  (M=Mn, Zn, Cu, Co) and (b,d,f,h) corresponding EDS mapping images.

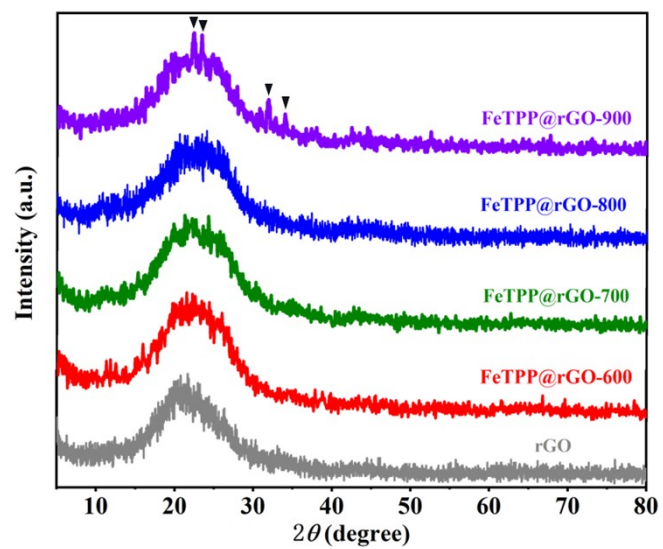

**Figure S4.** (a) XRD patterns of rGO and FeTPP@rGO- $t$  ( $t=600/700/800/900$ ).



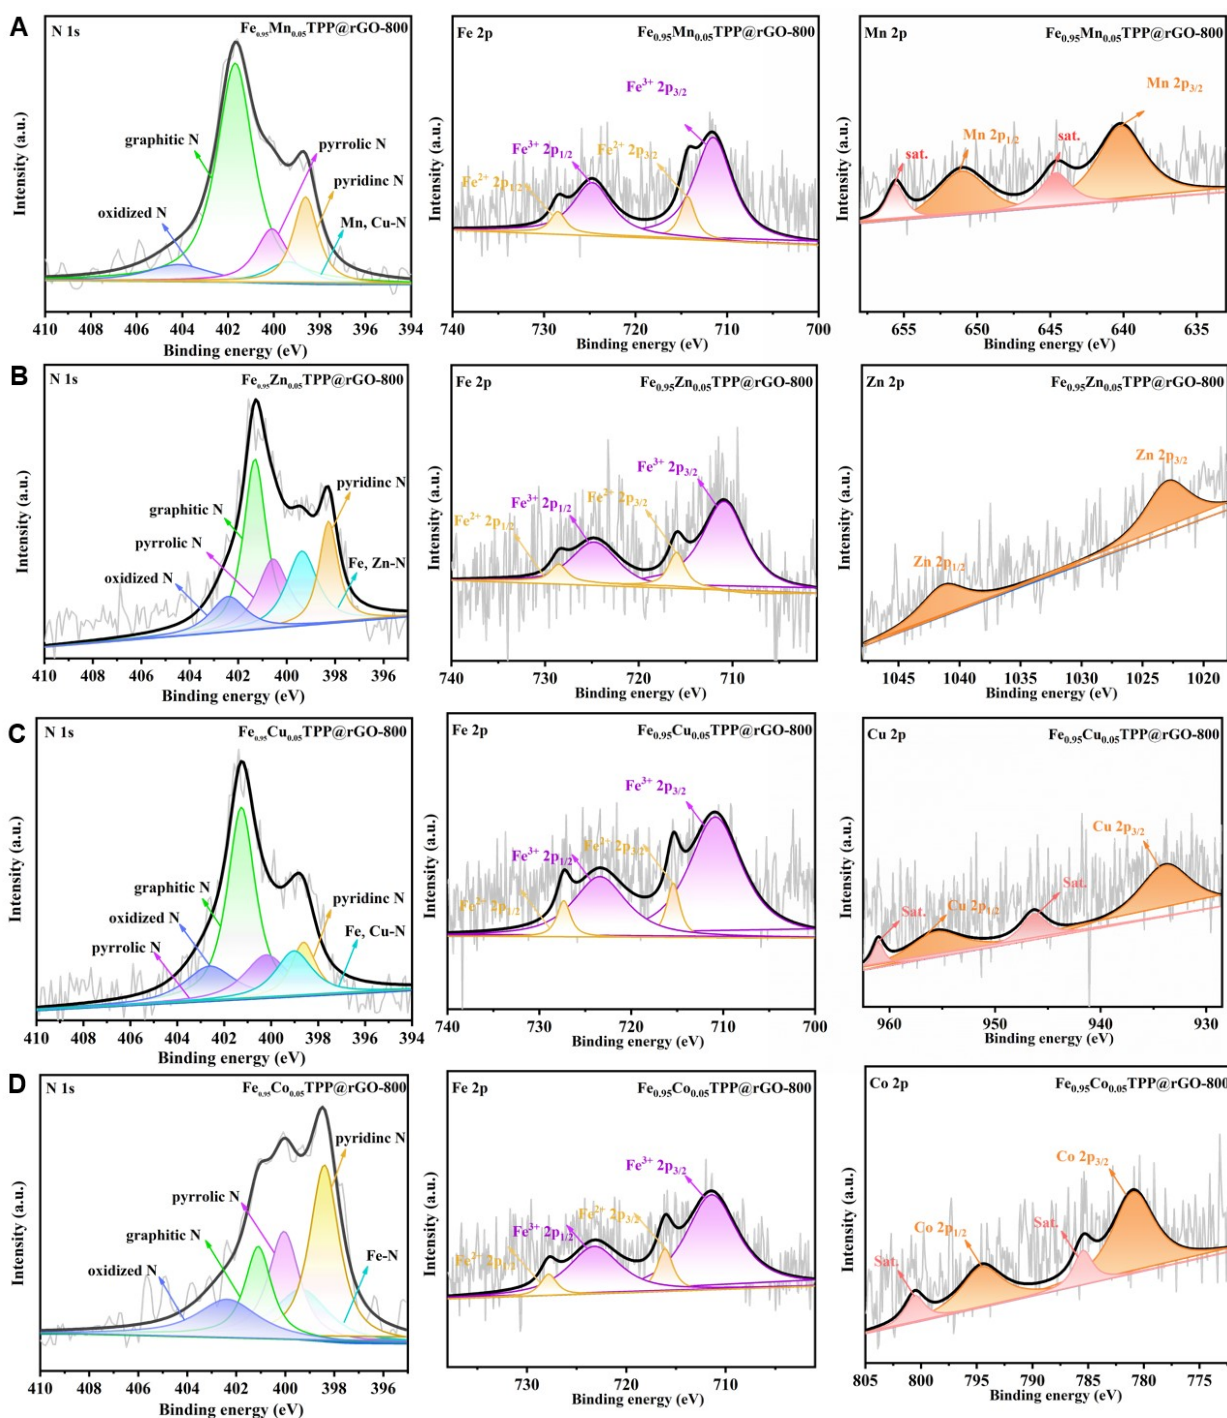

**Figure S5.** XPS survey spectrum of (A)  $\text{Fe}_{0.95}\text{Mn}_{0.05}\text{TPP}@r\text{GO}-800$ , (A)  $\text{Fe}_{0.95}\text{Zn}_{0.05}\text{TPP}@r\text{GO}-800$ , (A)  $\text{Fe}_{0.95}\text{Cu}_{0.05}\text{TPP}@r\text{GO}-800$ , (A)  $\text{Fe}_{0.95}\text{Co}_{0.05}\text{TPP}@r\text{GO}-800$ .

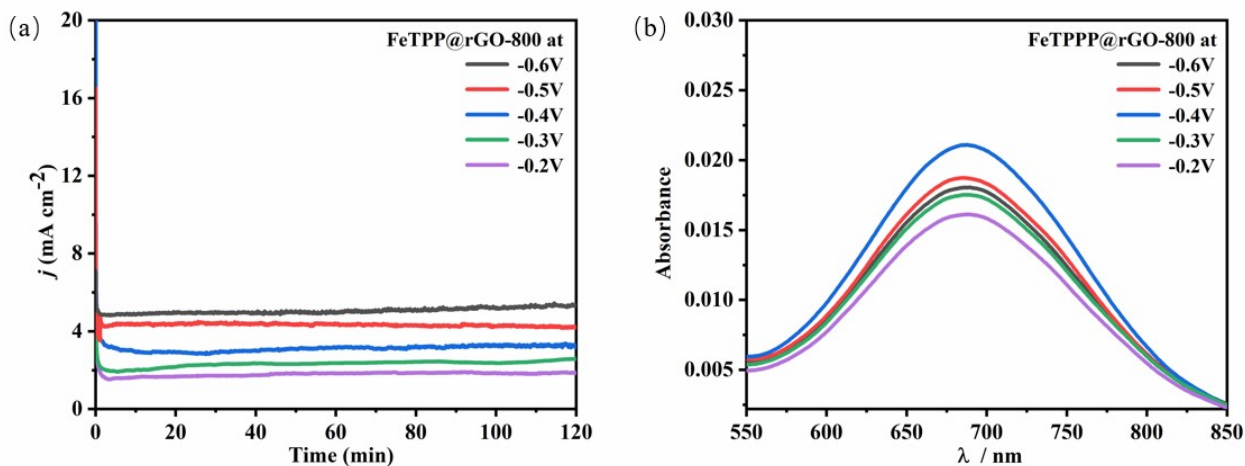

**Figure S6.** (a) Chronoamperometry curves of FeTPP@rGO-800 recorded in N<sub>2</sub>-saturated electrolyte at the given potentials. (b) Corresponding UV-vis absorption spectra of the electrolytes stained with indophenol indicator.

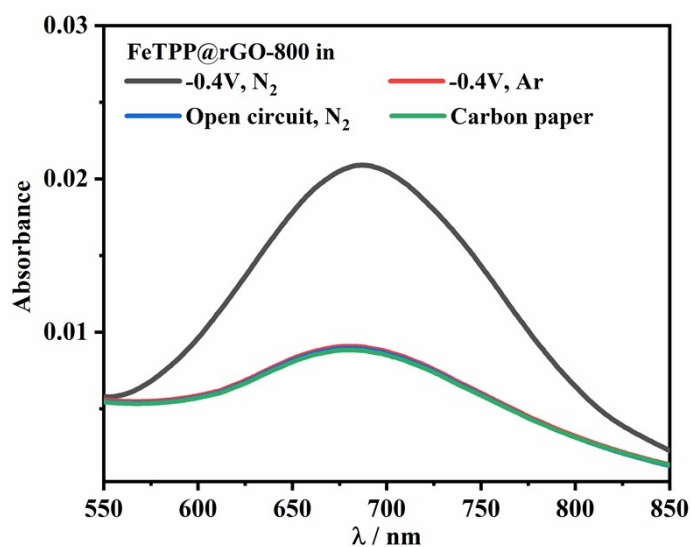

**Figure S7.** UV-vis absorption spectra of the electrolytes stained with indophenol indicator after 2h potentiostatic electrolysis on FeTPP@rGO-800 in the following conditions: (1) N<sub>2</sub>-saturated electrolyte at-0.4 V (all potentials are versus RHE); (2) Ar-saturated electrolyte at-0.4 V; (3) N<sub>2</sub>-saturated electrolyte at the open circuit potential; (4) pure carbon paper.

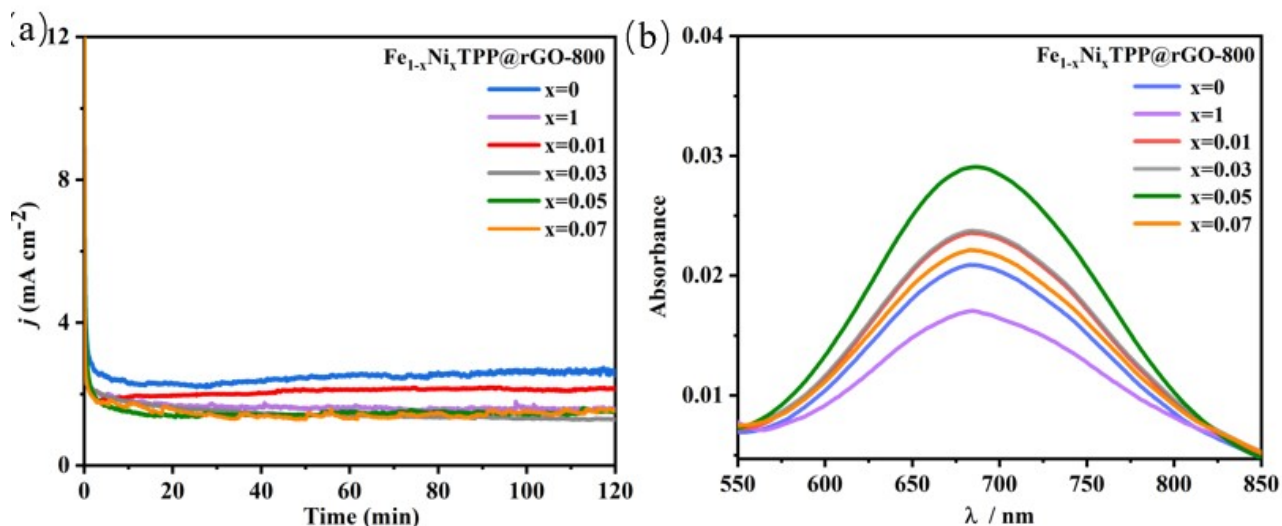

**Figure S8.** (a) Chronoamperometry curves of  $\text{Fe}_{1-x}\text{M}_x\text{TPP@rGO-800}$  recorded in  $\text{N}_2$ -saturated electrolyte at the potential of -0.4V. (b) Corresponding UV-vis absorption spectra of the electrolytes stained with indophenol indicator.

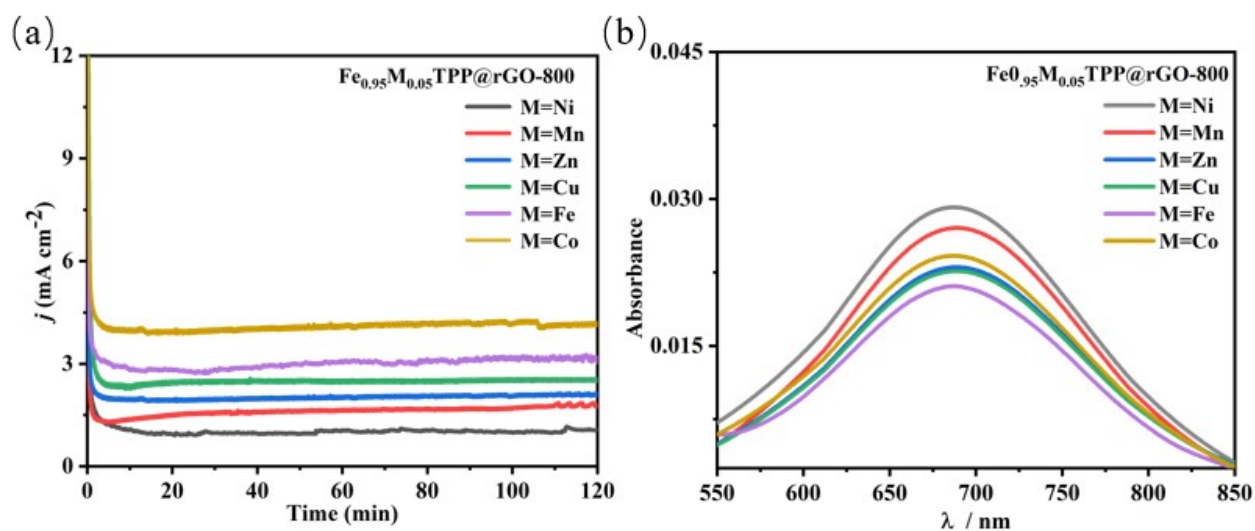

**Figure S9.** (a) Chronoamperometry curves of  $\text{Fe}_{0.95}\text{M}_{0.05}\text{TPP@rGO-800}$  recorded in  $\text{N}_2$ -saturated electrolyte at the potential of -0.4V. (b) Corresponding UV-vis absorption spectra of the electrolytes stained with indophenol indicator.

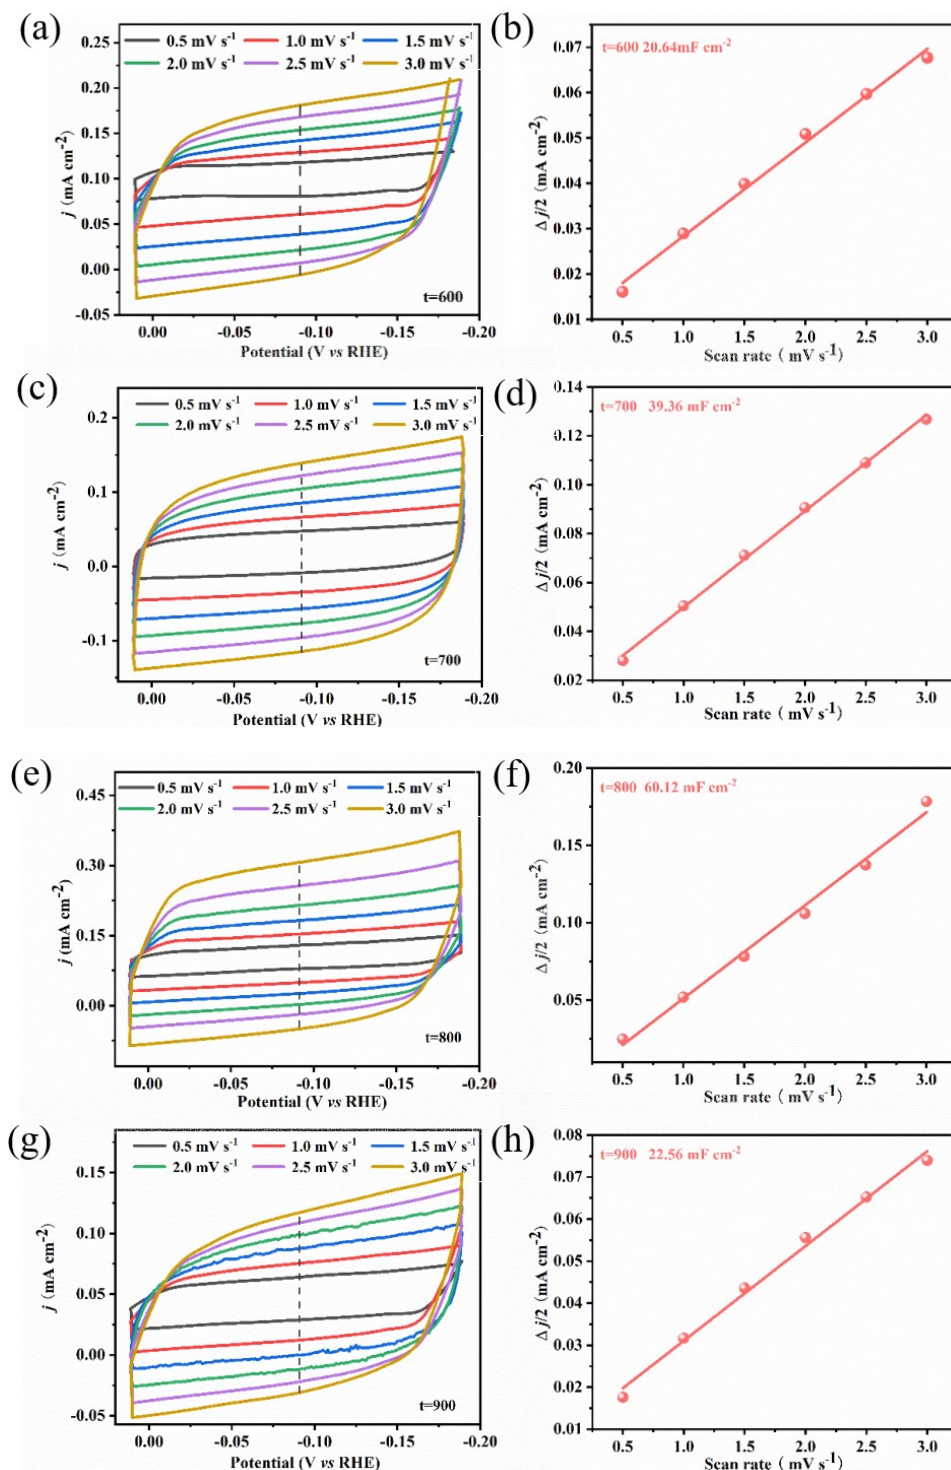

**Figure S10.** Electrochemical surface area measurement of the FeTPP@rGO-t(t=600/700/800/900) samples using double-layer capacitance. (a, c, e, g) Cyclic voltammograms of FeTPP@rGO-600, FeTPP@rGO-700, FeTPP@rGO-800, FeTPP@rGO-900 at various scan rates from 0.5 to 3 mV s<sup>-1</sup> in the potential range between 0.01~0.19 V vs RHE. (b, d, f, h) Corresponding double-layer charging current against the scan rate, and the slope of the linear fit is double-layer capacitance.



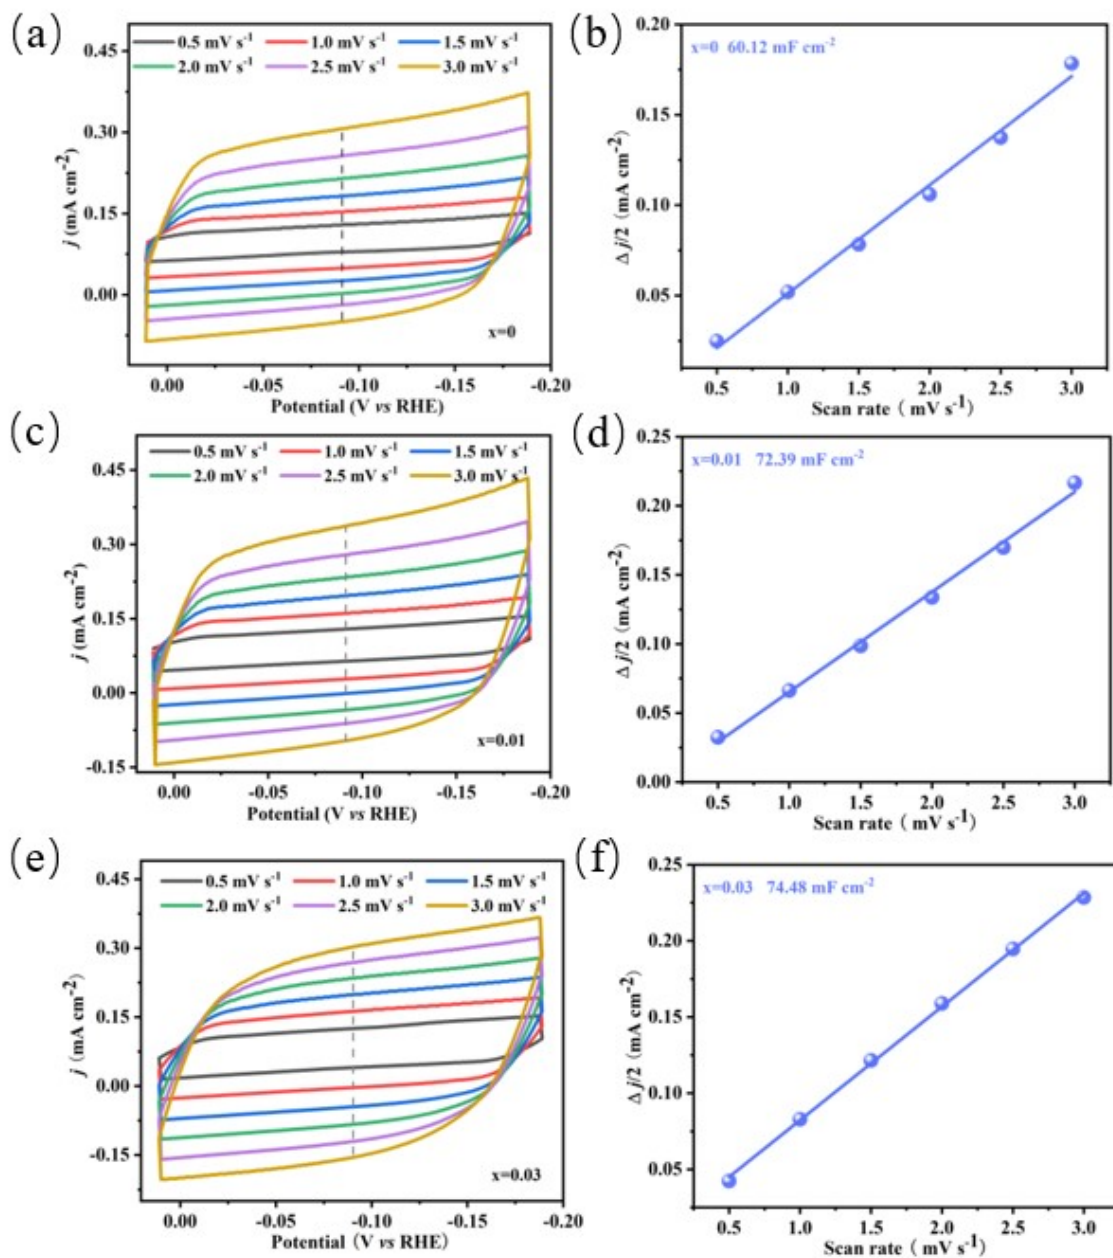

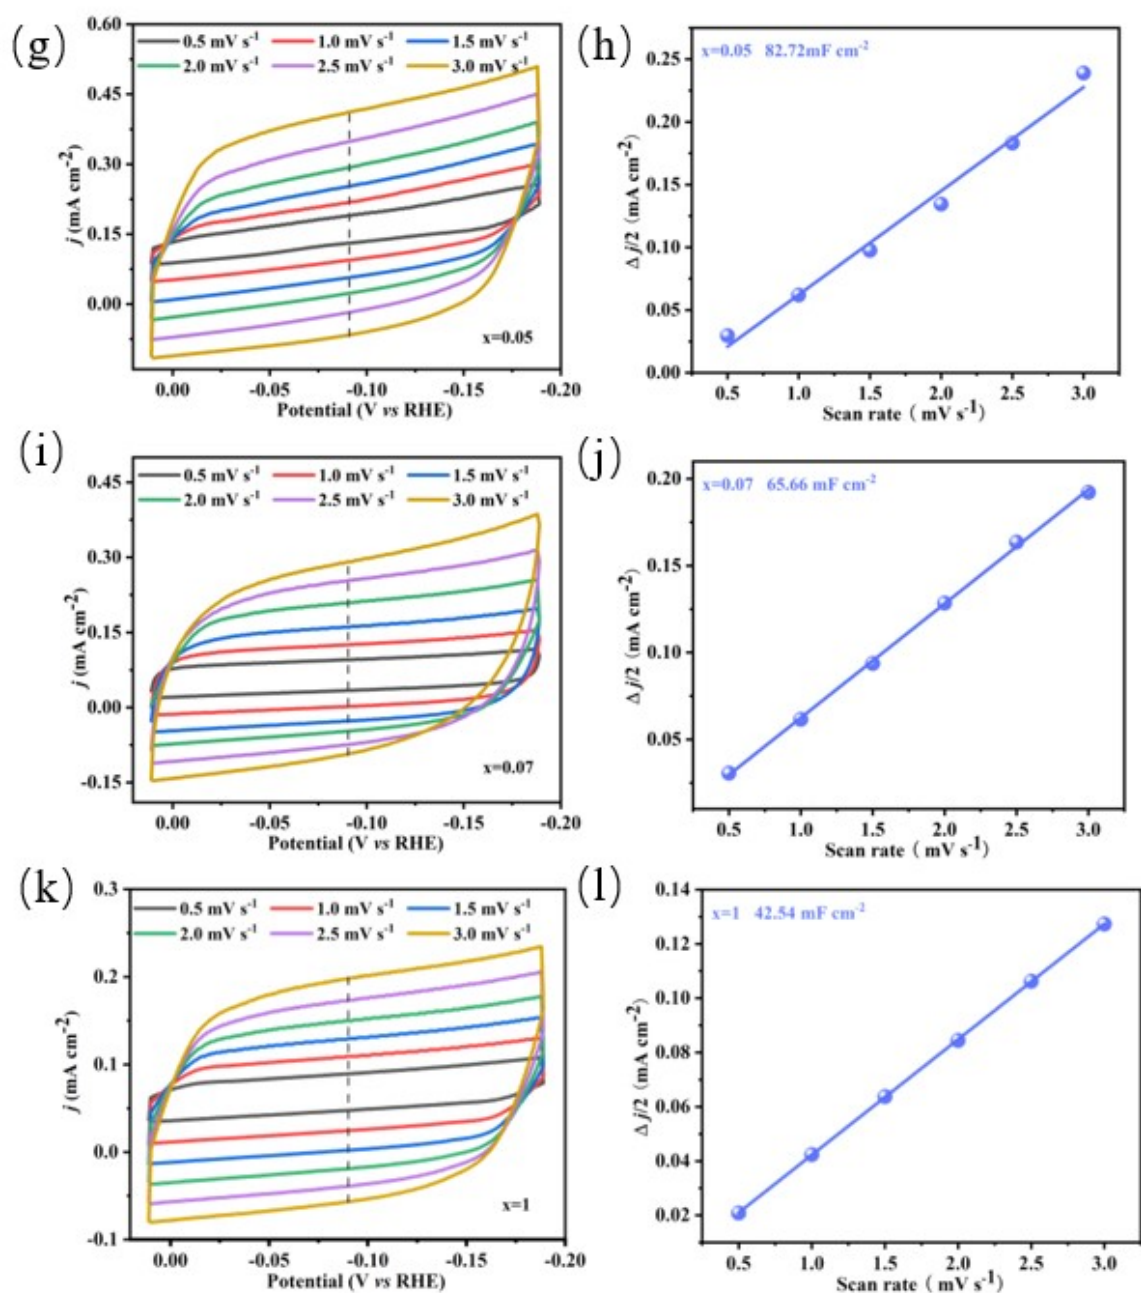

**Figure S11.** Electrochemical surface area measurement of the  $\text{Fe}_{1-x}\text{Ni}_x\text{TPP@rGO-800}$  samples using double-layer capacitance. (a, c, e, g, i, k) Cyclic voltammograms of  $\text{FeTPP@rGO-800}$ ,  $\text{Fe}_{0.99}\text{Ni}_{0.01}\text{TPP@rGO-800}$ ,  $\text{Fe}_{0.97}\text{Ni}_{0.03}\text{TPP@rGO-800}$ ,  $\text{Fe}_{0.95}\text{Ni}_{0.05}\text{TPP@rGO-800}$ ,  $\text{Fe}_{0.93}\text{Ni}_{0.07}\text{TPP@rGO-800}$ ,  $\text{NiTPP@rGO-800}$  at various scan rates from 0.5 to 3  $\text{mV s}^{-1}$  in the potential range between 0.01~0.19 V vs RHE. (b, d, f, h, j, l) Corresponding double-layer charging current against the scan rate, and the slope of the linear fit is double-layer capacitance.

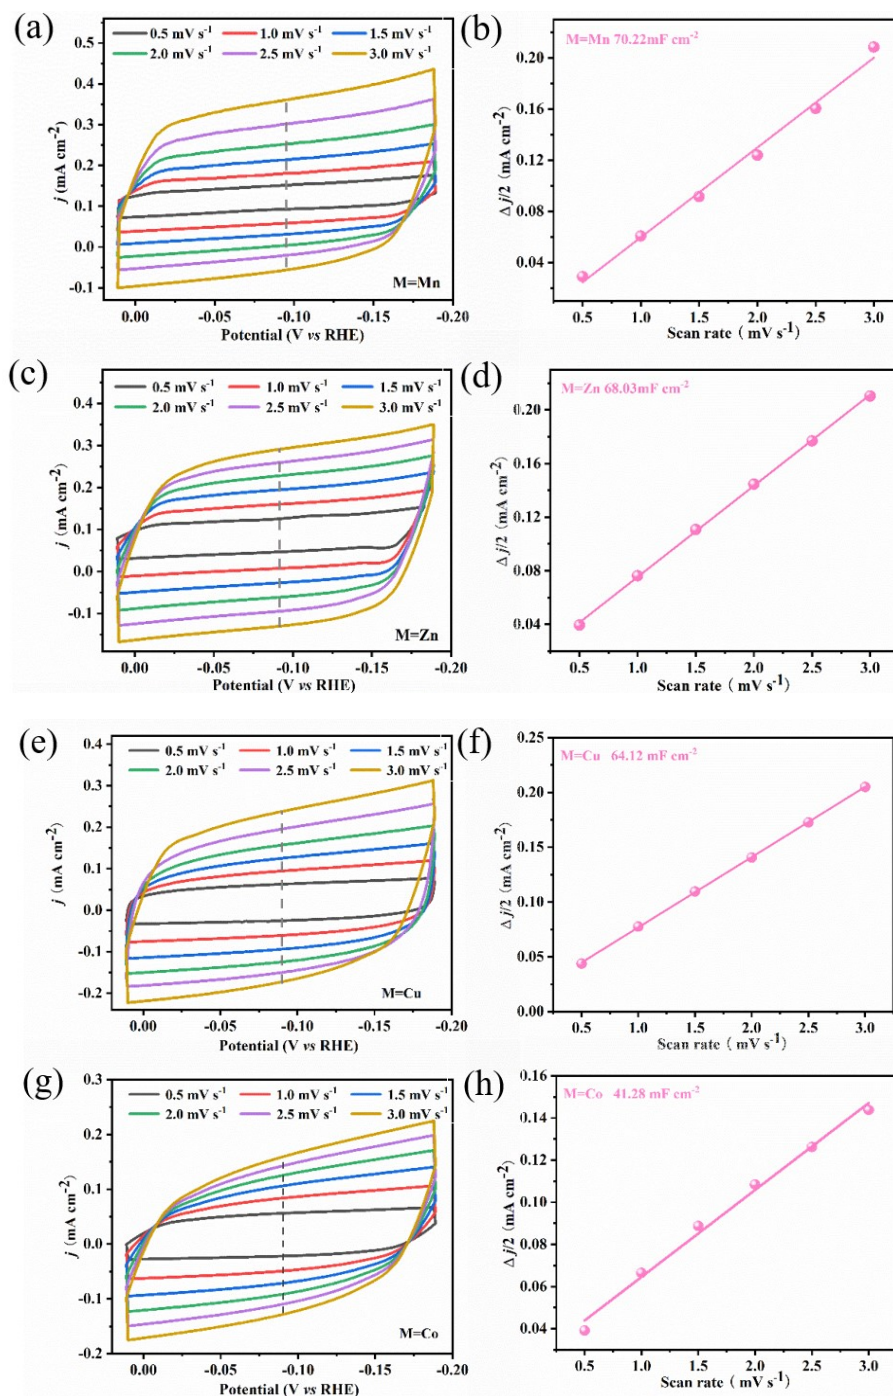

**Figure S12.** Electrochemical surface area measurement of the  $\text{Fe}_{0.95}\text{M}_{0.05}\text{TPP@rGO-800}$  (M=Mn, Zn, Cu, Co) samples using double-layer capacitance. (a, c, e, g) Cyclic voltammograms of  $\text{Fe}_{0.95}\text{Mn}_{0.05}\text{TPP@rGO-800}$ ,  $\text{Fe}_{0.95}\text{Zn}_{0.05}\text{TPP@rGO-800}$ ,  $\text{Fe}_{0.95}\text{Cu}_{0.05}\text{TPP@rGO-800}$  and  $\text{Fe}_{0.95}\text{Co}_{0.05}\text{TPP@rGO-800}$  at various scan rates from 0.5 to 3  $\text{mV s}^{-1}$  in the potential range between 0.01~0.19 V vs RHE. (b, d, f, h) Corresponding double-layer charging current against the scan rate, and the slope of the linear fit is double-layer capacitance.



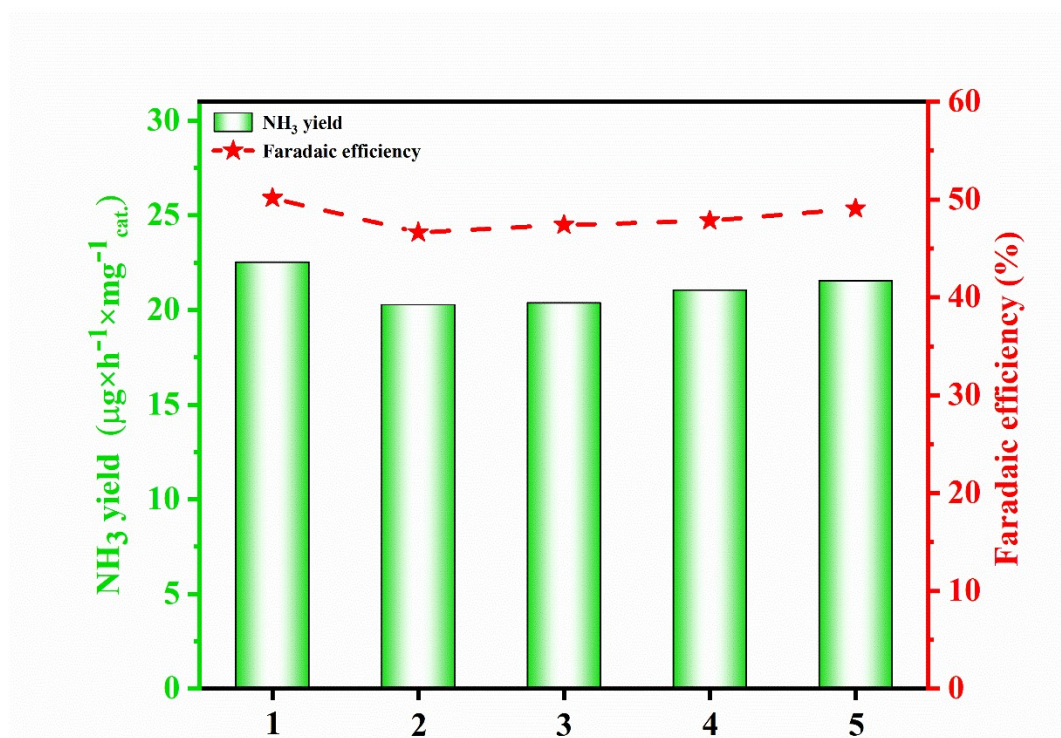

**Figure S13.** Cycling experiments for Fe<sub>0.95</sub>Ni<sub>0.05</sub>TPP@rGO-800.

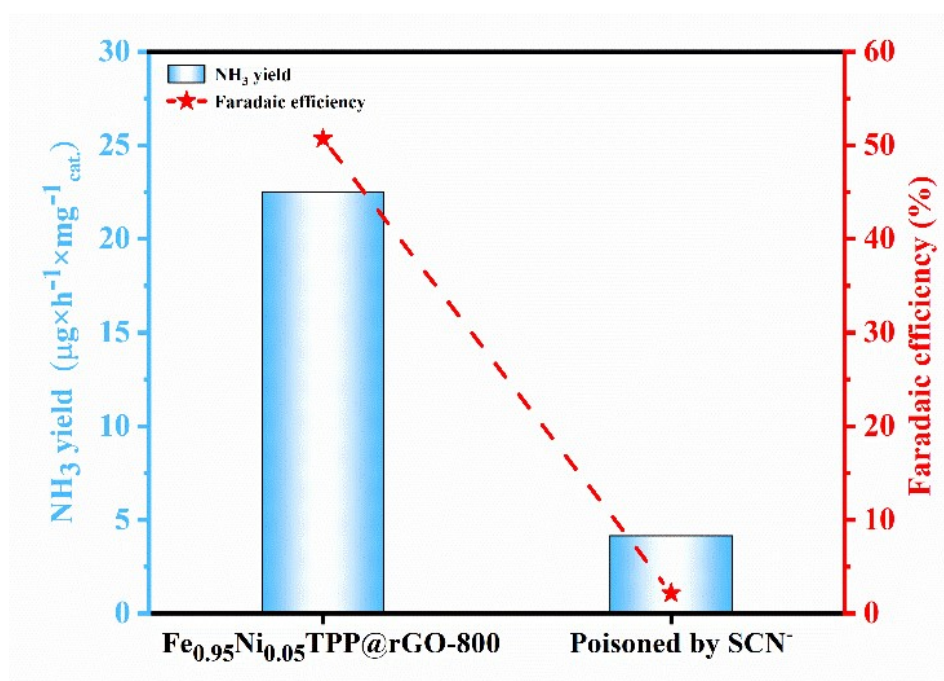

**Figure S14.** NH<sub>3</sub> yield rate and Faradaic efficiency of Fe<sub>0.95</sub>Ni<sub>0.05</sub>TPP@rGO-800 before and after SCN<sup>-</sup> poisoning.



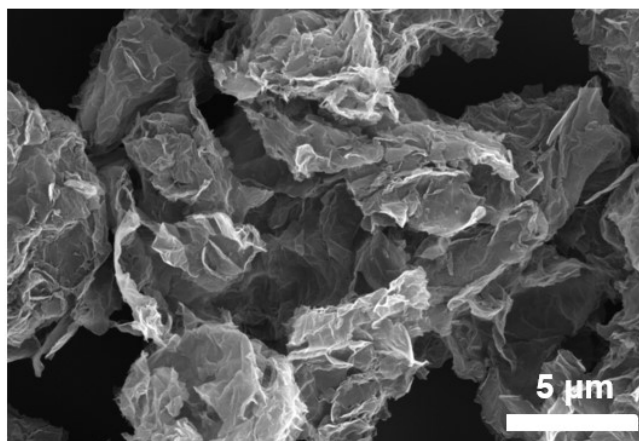

**Figure S15.** SEM for  $\text{Fe}_{0.95}\text{Ni}_{0.05}\text{TPP@rGO-800}$  after 10 h electrolysis test.

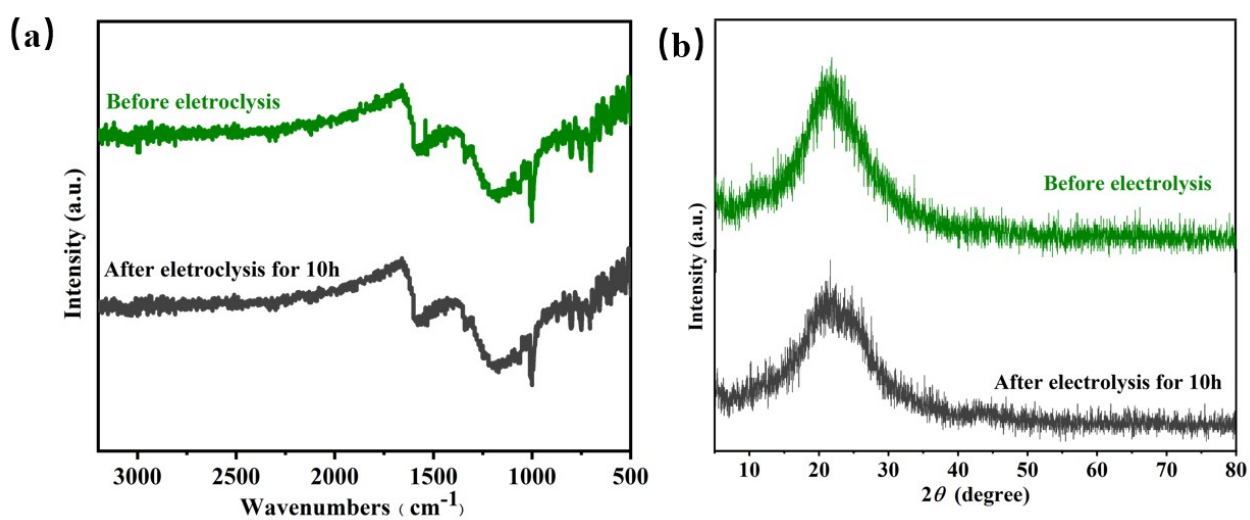

**Figure S16.** (a) FTIR, (b) XRD of  $\text{Fe}_{0.95}\text{Ni}_{0.05}\text{TPP@rGO-800}$  before and after electrolysis for 10 h.
